# Supplementary material for: PTPN2 regulates T cell lineage commitment and αβ versus γδ specification
Source: PubMed Central journal article supplement — J Exp Med. 2017 Sep 4;214(9):2733–58. doi: 10.1084/jem.20161903 (PMC5584121; doi:10.1084/jem.20161903), 2017-09-04
Supplement: JEM_20161903_sm.pdf [file JEM_20161903_sm.pdf]

SUPPLEMENTAL MATERIAL

Wiede et al., <https://doi.org/10.1084/jem.20161903>

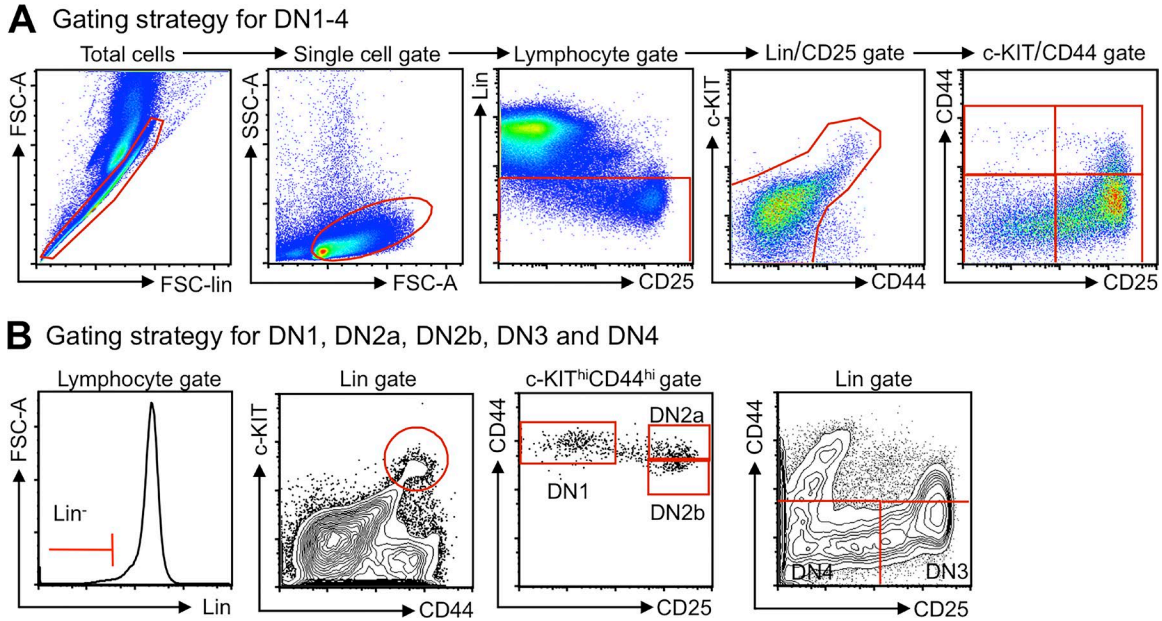

Figure S1. **Gating strategy for DN1–4 thymocytes.** (A and B) Lin<sup>-</sup> thymocytes were stained with fluorochrome-conjugated antibodies for CD25, CD44, and c-KIT. (A) Lin<sup>-</sup> CD25<sup>+/-</sup> thymocytes were gated for c-KIT versus CD44 expression to exclude CD44<sup>+</sup>c-KIT<sup>-</sup> cells. DN1–4 thymocytes were defined as DN1 (CD25<sup>-</sup>CD44<sup>+</sup>c-KIT<sup>hi</sup>), DN2 (CD25<sup>+</sup>CD44<sup>+</sup>c-KIT<sup>hi</sup>), DN3 (CD25<sup>+</sup>CD44<sup>-</sup>c-KIT<sup>-</sup>), and DN4 (CD25<sup>-</sup>CD44<sup>-</sup>c-KIT<sup>-</sup>). (B) Lin<sup>-</sup> thymocytes were gated for c-KIT<sup>+</sup>CD44<sup>+</sup> cells to define DN1 (CD25<sup>-</sup>CD44<sup>hi</sup>c-KIT<sup>hi</sup>), DN2a (CD25<sup>+</sup>CD44<sup>hi</sup>c-KIT<sup>hi</sup>), and DN2b (CD25<sup>+</sup>CD44<sup>lo</sup>c-KIT<sup>hi</sup>). Lin<sup>-</sup> DN3 was defined as CD25<sup>+</sup>CD44<sup>-</sup>c-KIT<sup>-</sup> and Lin<sup>-</sup> DN4 as CD25<sup>-</sup>CD44<sup>-</sup>c-KIT<sup>-</sup>.

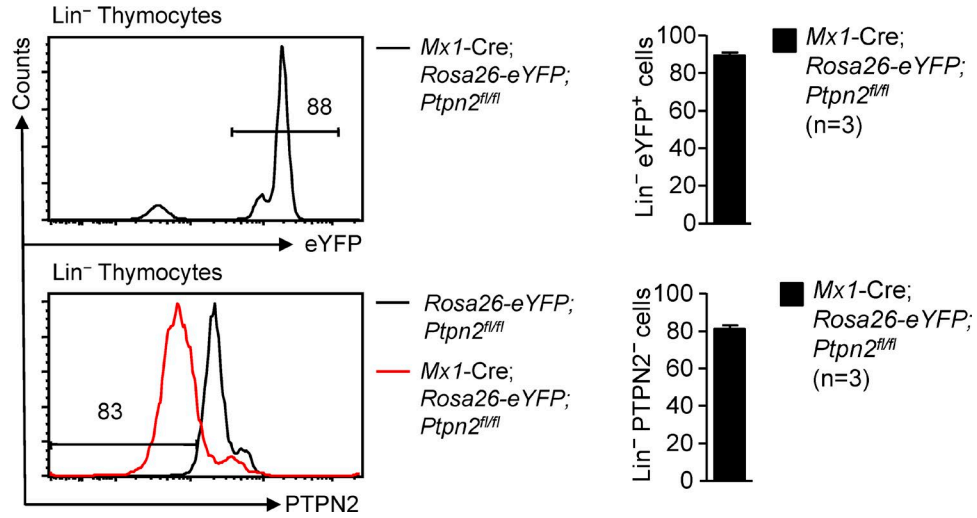

Figure S2. **PTPN2 deletion in *Mx1-Cre;Rosa26-eYFP;Ptpn2<sup>fl/fl</sup>* DN thymocytes.** Lin<sup>-</sup> thymocytes from poly (I:C)-treated *Rosa26-eYFP;Ptpn2<sup>fl/fl</sup>* (C57BL/6) and *Mx1-Cre;Rosa26-eYFP;Ptpn2<sup>fl/fl</sup>* (C57BL/6) mice were stained intracellularly with fluorochrome-conjugated  $\alpha$ -PTPN2. eYFP fluorescence in Lin<sup>-</sup> *Mx1-Cre;Rosa26-eYFP;Ptpn2<sup>fl/fl</sup>* (C57BL/6) thymocytes and PTPN2 levels in eYFP<sup>+</sup> (*Mx1-Cre;Rosa26-eYFP;Ptpn2<sup>fl/fl</sup>*) (C57BL/6) versus eYFP<sup>-</sup> (*Rosa26-eYFP;Ptpn2<sup>fl/fl</sup>*) (C57BL/6) Lin<sup>-</sup> thymocytes were quantified by flow cytometry. Representative results (means  $\pm$  SEM; *Mx1-Cre;Rosa26-eYFP;Ptpn2<sup>fl/fl</sup>*,  $n = 3$ ) from at least three independent experiments are shown.

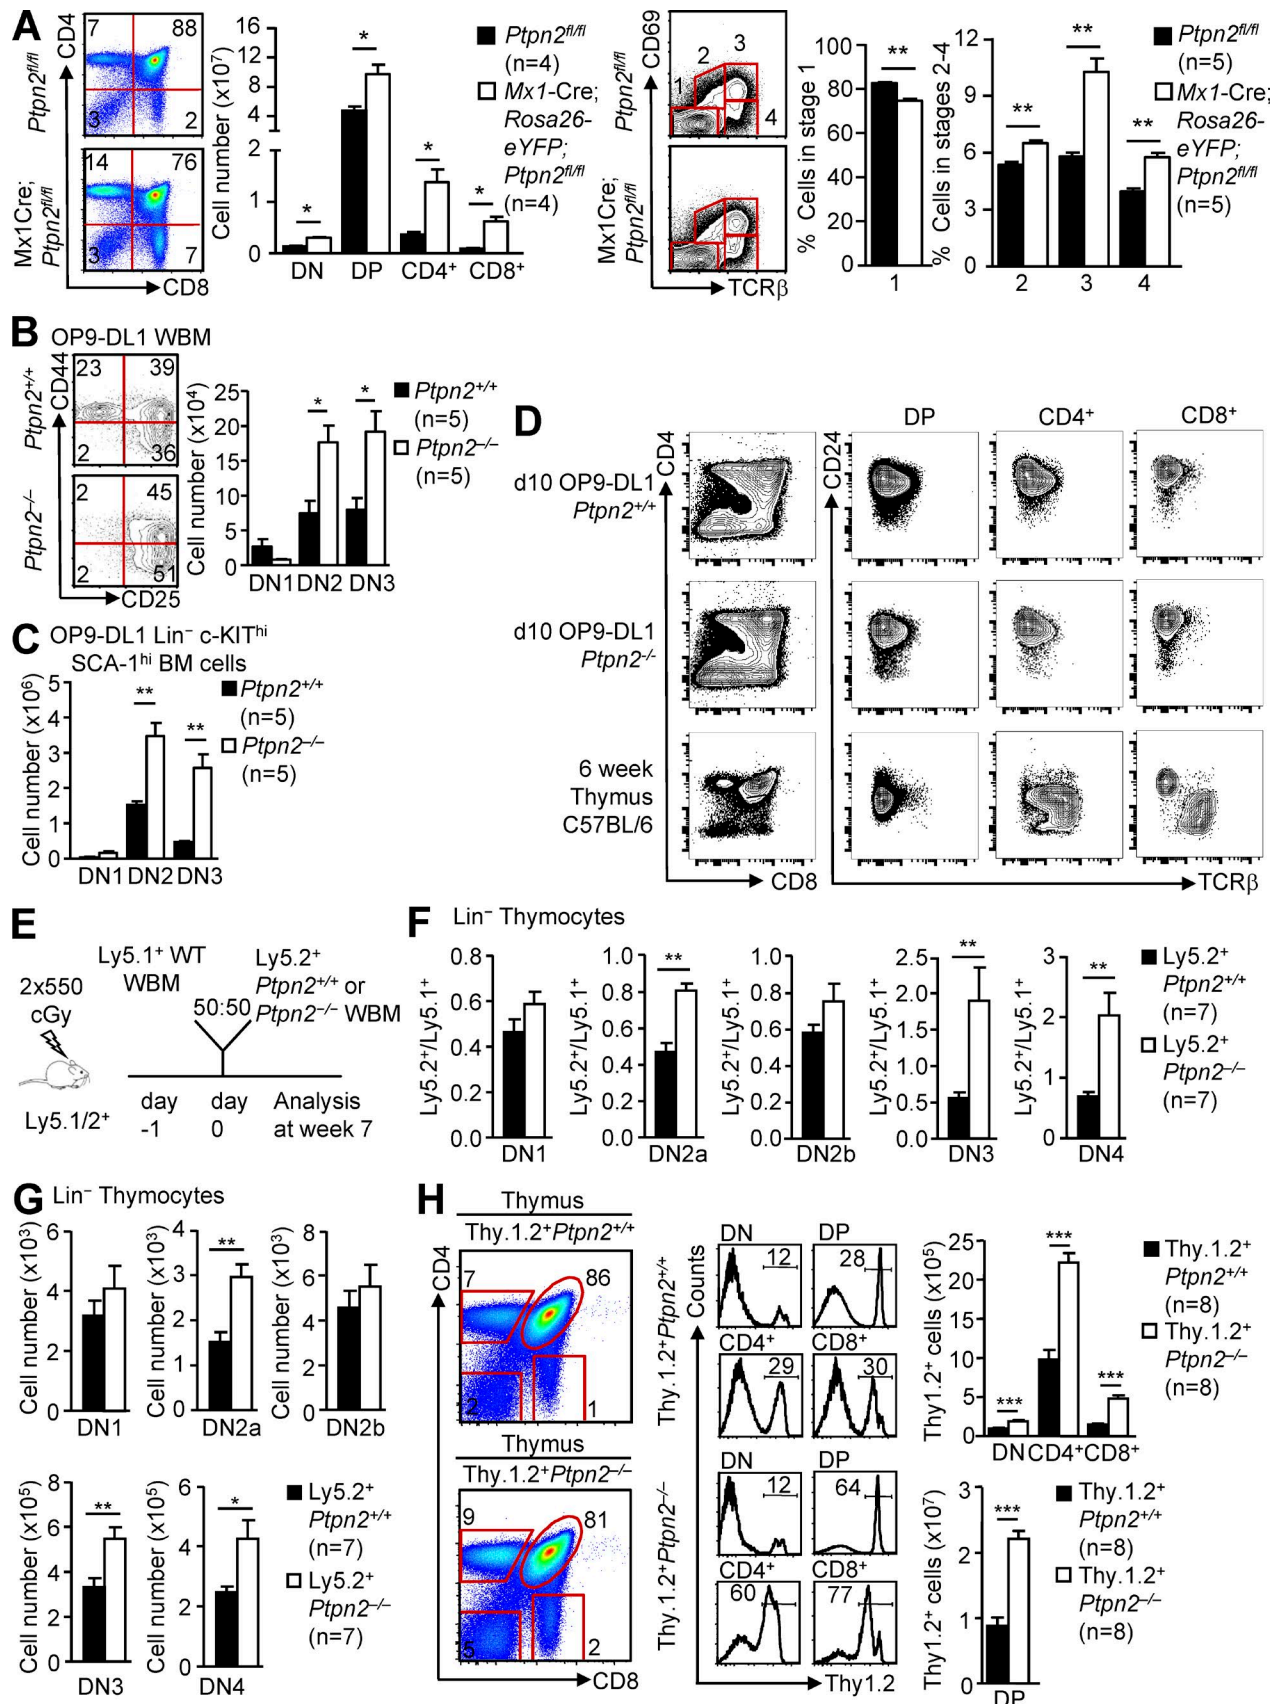

Figure S3. **PTPN2 deficiency results in enhanced positive selection.** (A) Thymocytes from poly (I:C)-treated *Rosa26-YFP;Ptpn2<sup>fl/fl</sup>* (C57BL/6) and *Mx1-Cre;Rosa26-eYFP;Ptpn2<sup>fl/fl</sup>* (C57BL/6) mice were stained for CD4, CD8, TCR- $\beta$ , and CD69 and then analyzed by flow cytometry. Cells were gated for the DN (CD4<sup>-</sup>CD8<sup>-</sup>), DP CD4<sup>+</sup>CD8<sup>+</sup>, CD4<sup>+</sup> SP, and CD8<sup>+</sup> SP subsets and thymocyte positive selection stages 1–4 according to CD69 and TCR- $\beta$  expression. (B and C) WBM cells (B) or FACS-purified Lin<sup>-</sup> c-KIT<sup>hi</sup> and SCA-1<sup>hi</sup> BM cells (C) from *Ptpn2<sup>+/+</sup>* (C57BL/6) and *Ptpn2<sup>-/-</sup>* (C57BL/6) mice were cultured on OP9-DL1 stromal cells for 9 d. Cells were harvested and stained with fluorochrome-conjugated antibodies against CD25 and CD44. DN1–3 cell numbers were determined by flow cytometry. (D) FACS-purified DN1 thymocytes from *Ptpn2<sup>+/+</sup>* (C57BL/6) and *Ptpn2<sup>-/-</sup>* (C57BL/6) mice were cultured for 10 d on OP9-DL1 stromal cells and stained for TCR- $\beta$ , CD24, CD4, and CD8. CD24 versus TCR- $\beta$  subsets were determined by flow cytometry. (E) Equal numbers of donor WBM cells ( $2 \times 10^6$ ) from Ly5.2<sup>+</sup>*Ptpn2<sup>+/+</sup>* (C57BL/6) or Ly5.2<sup>+</sup>*Ptpn2<sup>-/-</sup>* (C57BL/6) mice and congenic Ly5.1<sup>+</sup> (C57BL/6) competitor cells were transferred into lethally irradiated ( $2 \times 550$  cGy) Ly5.1/Ly5.2<sup>+</sup> (C57BL/6) recipient animals. Donor cell contribution in the thymus was assessed at 7 wk after transplantation. (F) Donor Ly5.2<sup>+</sup>*Ptpn2<sup>+/+</sup>* (C57BL/6) or Ly5.2<sup>+</sup>*Ptpn2<sup>-/-</sup>* (C57BL/6) and Ly5.1<sup>+</sup> competitor (C57BL/6) DN subset ratios. (G) Absolute numbers of donor Ly5.2<sup>+</sup>*Ptpn2<sup>+/+</sup>* (C57BL/6) versus Ly5.2<sup>+</sup>*Ptpn2<sup>-/-</sup>* (C57BL/6) DN subsets. (H) Representative profiles, percentages, and absolute numbers of donor-derived Thy1.2<sup>+</sup>*Ptpn2<sup>+/+</sup>* (BALB/c) or Thy1.2<sup>+</sup>*Ptpn2<sup>-/-</sup>* (BALB/c) DN, DP, CD4<sup>+</sup>, and CD8<sup>+</sup> SP thymocyte subsets in lethally irradiated ( $2 \times 550$  cGy) BALB/c recipient animals that had received equal numbers of donor WBM cells ( $2 \times 10^6$ ) from Thy1.2<sup>+</sup>*Ptpn2<sup>+/+</sup>* (BALB/c) or Thy1.2<sup>+</sup>*Ptpn2<sup>-/-</sup>* (BALB/c) mice and congenic Thy1.1<sup>+</sup> competitor cells. Representative results (means  $\pm$  SEM; *Ptpn2<sup>+/+</sup>*,  $n = 5$ ; *Ptpn2<sup>-/-</sup>*,  $n = 5$ ; *Rosa26-eYFP;Ptpn2<sup>fl/fl</sup>*,  $n = 4$ –5; *Mx1-Cre;Rosa26-eYFP;Ptpn2<sup>fl/fl</sup>*,  $n = 4$ –5; Ly5.2<sup>+</sup>*Ptpn2<sup>+/+</sup>*,  $n = 7$ ; Ly5.2<sup>+</sup>*Ptpn2<sup>-/-</sup>*,  $n = 7$ ; Thy1.2<sup>+</sup>*Ptpn2<sup>+/+</sup>*,  $n = 8$ ; and Thy1.2<sup>+</sup>*Ptpn2<sup>-/-</sup>*,  $n = 8$ ) from at least two (B–G) or three (A and H) independent experiments are shown. Significance was determined using a two-tailed Mann-Whitney *U* test. \*,  $P < 0.05$ ; \*\*,  $P < 0.01$ ; \*\*\*,  $P < 0.01$ .

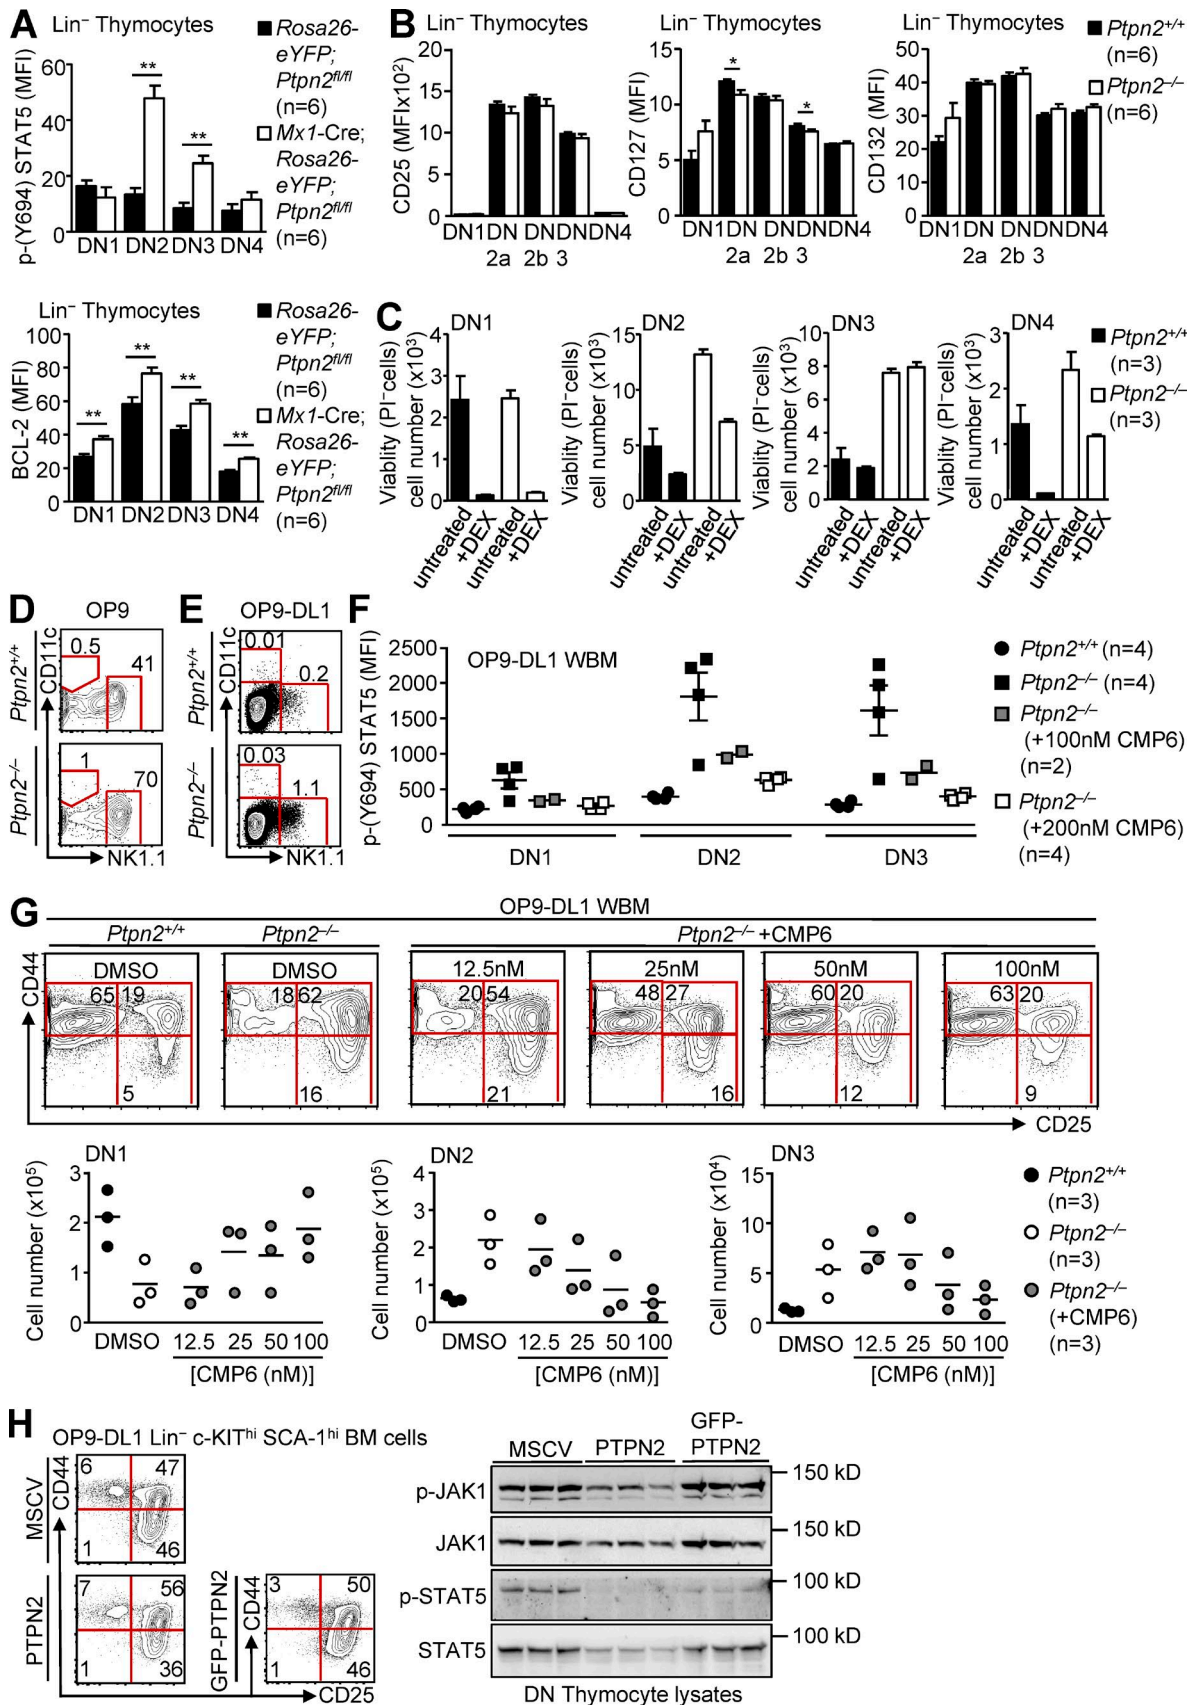

Figure S4. **STAT5 signaling in DN thymocytes.** (A) Lin<sup>-</sup> thymocytes from poly (I:C)-treated *Rosa26-eYFP;Ptpn2<sup>fl/fl</sup>* (C57BL/6) and *Mx1-Cre; Rosa26-eYFP;Ptpn2<sup>fl/fl</sup>* (C57BL/6) mice were stained with fluorochrome-conjugated antibodies against CD25, CD44, and c-KIT. The levels of intracellular p-(Y694) STAT5 (p-STAT5; i.e., activated STAT5) or BCL-2 were determined by flow cytometry. DN subset p-STAT5 and BCL-2 MFIs were determined. (B) Lin<sup>-</sup> *Ptpn2<sup>+/+</sup>* (C57BL/6) and *Ptpn2<sup>-/-</sup>* (C57BL/6) thymocytes were stained with fluorochrome-conjugated antibodies against CD25, CD44, c-KIT, CD127, and CD132. CD25 (IL-2R- $\alpha$  chain), CD127 (IL-7R- $\alpha$  chain), and CD132 (common  $\gamma$  chain) MFIs in DN1–4 were determined by flow cytometry. (C) Lin<sup>-</sup> thymocytes ( $2 \times 10^5$ ) from *Ptpn2<sup>+/+</sup>* (C57BL/6) and *Ptpn2<sup>-/-</sup>* (C57BL/6) mice were cultured overnight in the presence of dexamethasone or vehicle control (ethanol; untreated). Thymocytes were harvested and stained with fluorochrome-conjugated antibodies against CD25 and CD44 plus propidium iodide (PI)<sup>-</sup> (i.e., live). DN1–4 cell numbers were quantified by flow cytometry. (D and E)  $10^2$  DN2a thymocytes from *Ptpn2<sup>+/+</sup>* (C57BL/6) and *Ptpn2<sup>-/-</sup>* (C57BL/6) mice were FACS purified, cultured on OP9 (D) or OP9-DL1 (E) stromal cells for 5 d, and then stained with fluorochrome-conjugated antibodies against the Lin markers CD11c and NK1.1. Cell subsets were quantified by flow cytometry. (F and G) WBM cells from *Ptpn2<sup>+/+</sup>* (C57BL/6) and *Ptpn2<sup>-/-</sup>* (C57BL/6) mice were cultured on OP9-DL1 stromal cells in the presence of the JAK PTK inhibitor CMP6 or vehicle control (DMSO). After 7 d, Lin<sup>-</sup> thymocytes were harvested and stained with fluorochrome-conjugated antibodies to CD25 and CD44. (F) MFIs for the intracellular staining of p-STAT5 for DN1–3 subsets were determined by flow cytometry. (G) DN cell subset numbers were quantified by flow cytometry. (H) Lin<sup>-</sup> SCA-1<sup>+</sup> c-KIT<sup>+</sup> BM cells from C57BL/6 mice were transduced with control retrovirus (MSCV) or retroviruses expressing WT PTPN2 or nuclear-restricted GFP-PTPN2. FACS-purified mCherry<sup>+</sup> (MSCV, WT-PTPN2) or mCherry<sup>+</sup>/GFP<sup>+</sup> (GFP-PTPN2) were cultured on OP9-DL1 stromal cells for 9 d in triplicates. DN2/3 thymocytes were harvested and stained with fluorochrome-conjugated antibodies against CD25 and CD44, and DN cell subsets were determined by flow cytometry. DN2/3 thymocyte lysates were resolved by SDS-PAGE and immunoblotted for p-STAT5, STAT5, p-(Y1022/Y1023) JAK-1 (p-JAK1), and JAK-1. Representative flow cytometry profiles (D, E, G, and H) and immunoblots (H) are shown. Representative results (means  $\pm$  SEM; *Ptpn2<sup>+/+</sup>*,  $n = 3-6$ ; *Ptpn2<sup>-/-</sup>*,  $n = 2-6$ ; *Rosa26-eYFP;Ptpn2<sup>fl/fl</sup>*,  $n = 6$ ; and *Mx1-Cre;Rosa26-eYFP;Ptpn2<sup>fl/fl</sup>*,  $n = 6$ ) from at least two independent experiments are shown. Significance was determined using a two-tailed Mann-Whitney *U* test. \*,  $P < 0.05$ ; \*\*,  $P < 0.01$ .

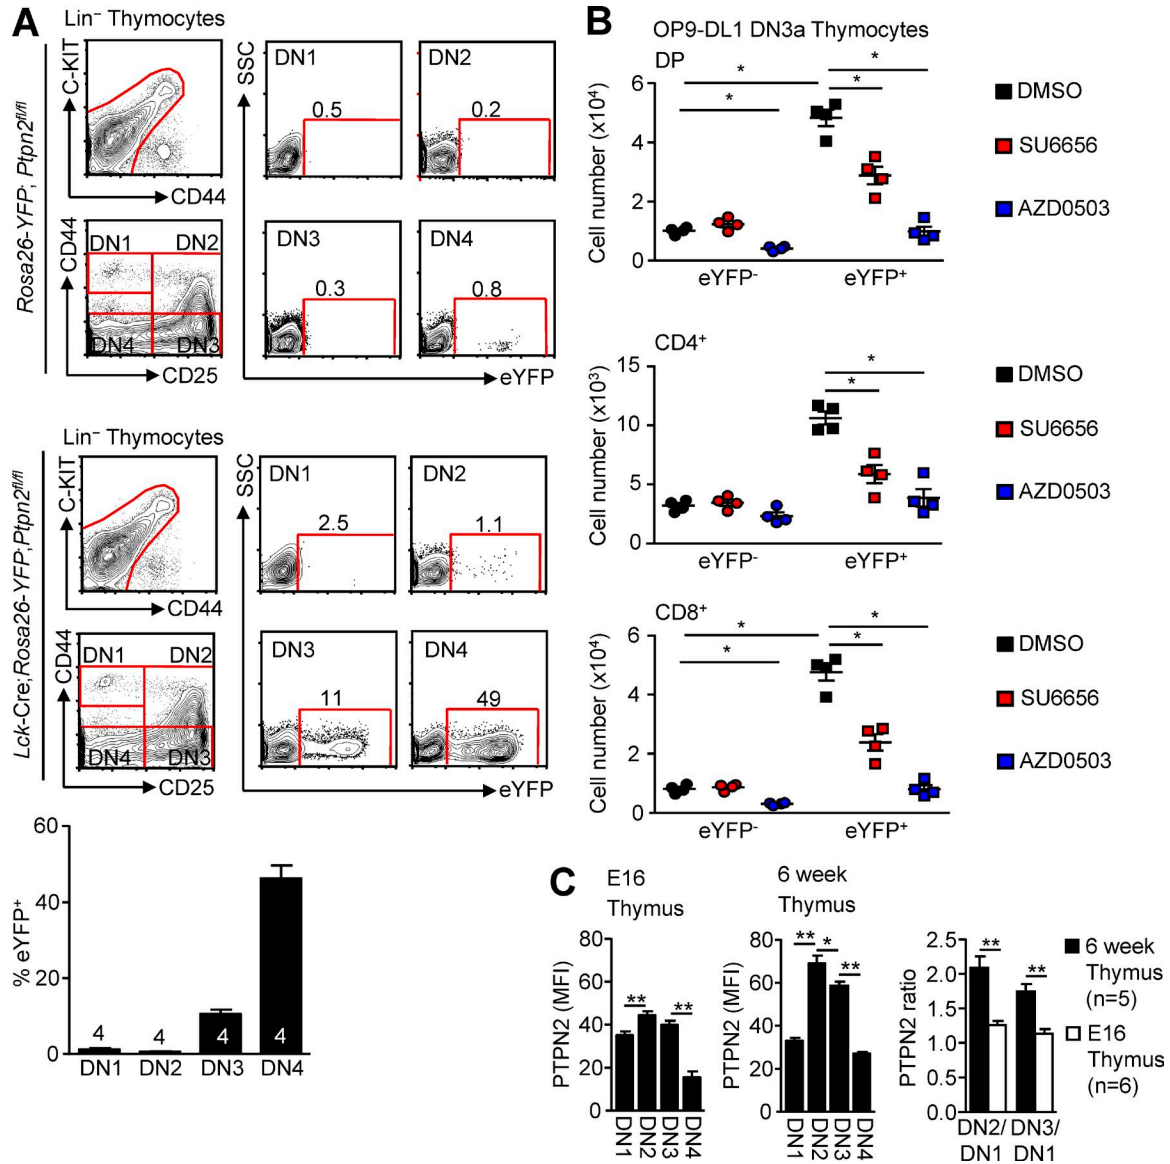

Figure S5. **SFK signaling in DN thymocytes from *Lck-Cre;Rosa26-YFP;Ptpn2<sup>fl/fl</sup>* mice and PTPN2 levels in DN thymocytes.** (A) Lin<sup>-</sup> thymocytes from *Rosa26-YFP;Ptpn2<sup>fl/fl</sup>* (YFP<sup>-</sup>) (C57BL/6) and *Lck-Cre;Rosa26-YFP;Ptpn2<sup>fl/fl</sup>* (YFP<sup>+</sup>) (C57BL/6) mice were stained with fluorochrome-conjugated antibodies against CD25, CD44, and c-KIT. Lin<sup>-</sup> DN1 (c-KIT<sup>+</sup>CD44<sup>+</sup>CD25<sup>-</sup>), Lin<sup>-</sup> DN2 (c-KIT<sup>+</sup>CD44<sup>+</sup>CD25<sup>+</sup>), Lin<sup>-</sup>DN3 (CD25<sup>+</sup>CD44<sup>-</sup>), and (CD25<sup>-</sup>CD44<sup>-</sup>) Lin<sup>-</sup>DN4 thymocytes were gated for YFP<sup>-</sup> (i.e., PTPN2 expressing) and eYFP<sup>+</sup> (i.e., PTPN2 deleted) cells, and the relative YFP<sup>+</sup> cells in DN subsets were determined by flow cytometry. (B) DN3a *Rosa26-YFP;Ptpn2<sup>fl/fl</sup>* (C57BL/6) eYFP<sup>-</sup> (PTPN2 expressing) and DN3a *Lck-Cre;Rosa26-YFP;Ptpn2<sup>fl/fl</sup>* (C57BL/6) eYFP<sup>+</sup> (PTPN2 deleted) thymocytes were cultured on OP9-DL1 cells for 3 d in the presence of DMSO vehicle control or the SFK PK inhibitors SU6656 or AZD0503. Thymocytes were harvested and stained with fluorochrome-conjugated antibodies against CD4 and CD8. DP, CD4<sup>+</sup> SP, and CD8<sup>+</sup> SP cell numbers were determined by flow cytometry. (C) Lin<sup>-</sup> thymocytes from E16 and 6-wk-old C57BL/6 mice were stained for CD25, CD44, and intracellular PTPN2. Relative PTPN2 levels (MFI) adjusted to cell size (PTPN2 MFI/FSC) and PTPN2 DN2/DN1 and DN3/DN1 ratios in E16 versus 6-wk-old C57BL/6 mice were determined by flow cytometry. Representative results (means  $\pm$  SEM; *Rosa26-YFP;Ptpn2<sup>fl/fl</sup>*,  $n = 4$ ; *Lck-Cre;Rosa26-YFP;Ptpn2<sup>fl/fl</sup>*,  $n = 4$ ; and C57BL/6,  $n = 5-6$ ) from at least two independent experiments are shown. Significance in B and C was determined using a two-tailed Mann-Whitney *U* test. \*,  $P < 0.05$ ; \*\*,  $P < 0.01$ .
